# Supplementary material for: Eosinophils capture viruses, a capacity that is defective in asthma
Source: PubMed Central journal article supplement — Allergy. 2019 May 15;74(10):1898–909. doi: 10.1111/all.13802 (PMC6852198; doi:10.1111/all.13802), 2019-05-15
Supplement: ALL-74-1898-s006.pdf [file ALL-74-1898-s006.pdf]

| <b>Patient</b> | <b>Asthma</b> | <b>Gender</b> | <b>FEV<sub>1</sub> [L]</b> | <b>ICS</b> | <b>OCS</b> |
|----------------|---------------|---------------|----------------------------|------------|------------|
| 1              | Moderate      | F             | 4.46                       | Y          | N          |
| 2              | Mild          | M             | 5.28                       | N          | N          |
| 3              | Severe        | F             | 2.34                       | Y          | N          |
| 4              | Mild          | M             | 4.74                       | N          | N          |
| 5              | Moderate      | F             | 2.23                       | Y          | N          |
| 6              | Moderate      | M             | 3.37                       | Y          | N          |
| 7              | Moderate      | F             | 3.57                       | Y          | N          |
| 8              | Moderate      | F             | 3.98                       | Y          | N          |
| 9              | Severe        | F             | 4.05                       | Y          | N          |
| 10             | Severe        | M             | 3.80                       | Y          | N          |
| 11             | Severe        | M             | 4.55                       | Y          | Y          |
| 12             | Severe        | M             | 3.27                       | Y          | N          |
| 13             | Severe        | M             | 3.62                       | Y          | N          |
| 14             | Severe        | M             | 2.97                       | Y          | Y          |
| 15             | Severe        | F             | 1.83                       | Y          | Y          |
| 16             | Severe        | M             | 2.43                       | Y          | Y          |
| 17             | Mild          | M             | 3,62                       | N          | N          |
