# Supplementary material for: Eosinophils capture viruses, a capacity that is defective in asthma
Source: PubMed Central journal article supplement — Allergy. 2019 May 15;74(10):1898–909. doi: 10.1111/all.13802 (PMC6852198; doi:10.1111/all.13802), 2019-05-15
Supplement: ALL-74-1898-s007.pdf [file ALL-74-1898-s007.pdf]

| Patient | Asthma | Gender | FEV1 [L] | M/P | ICS/OCS | Allergy |
|---------|--------|--------|----------|-----|---------|---------|
| 18      | Mild   | M      | 4.58     | M   | N       | Y       |
| 19      | Mild   | F      | 3.28     | M   | N       | Y       |
| 20      | Mild   | F      | 2.93     | P   | N       | Y       |
| 21      | Mild   | F      | 2.31     | M   | N       | Y       |
| 22      | Mild   | F      | 4.37     | M   | N       | Y       |
| 23      | Mild   | M      | 4.11     | P   | N       | Y       |
| 24      | Mild   | F      | 2.97     | P   | N       | Y       |
| 25      | Mild   | F      | 3.34     | M   | N       | Y       |
| 26      | Mild   | F      | 4.00     | P   | N       | Y       |
| 27      | Mild   | M      | 5.09     | P   | N       | Y       |
| 28      | Mild   | F      | 2.52     | M   | N       | Y       |
| 29      | Mild   | F      | 3.92     | P   | N       | Y       |
| 30      | Mild   | F      | 3.71     | M   | N       | Y       |
| 31      | Mild   | M      | 4.86     | P   | N       | Y       |
| 32      | Mild   | F      | 3.04     | P   | N       | Y       |
| 33      | Mild   | F      | 3.86     | M   | N       | Y       |
| 34      | Mild   | F      | 3.21     | P   | N       | Y       |
| 35      | Mild   | M      | 5.27     | P   | N       | Y       |
| 36      | Mild   | F      | 2.90     | P   | N       | Y       |

|                    | Placebo <sup>a</sup> |        | Mepolizumab <sup>a</sup> |        |
|--------------------|----------------------|--------|--------------------------|--------|
| <b>FEV1%pred</b>   | 102.09               | 6.89   | 103.08                   | 9.95   |
| <b>FVC</b>         | 4.38                 | 0.95   | 3.91                     | 0.78   |
| <b>Male/Female</b> | 4/11                 |        | 1/7                      |        |
| <b>Age (yr)</b>    | 22.00                | 4.15   | 23.77                    | 5.46   |
| <b>IgE (kU/L)</b>  | 436.28               | 705.22 | 220.04                   | 269.21 |
