# Supplementary figures and images for: Eosinophils capture viruses, a capacity that is defective in asthma
Source: PubMed Central journal article supplement — Allergy. 2019 May 15;74(10):1898–909. doi: 10.1111/all.13802 (PMC6852198; doi:10.1111/all.13802), 2019-05-15

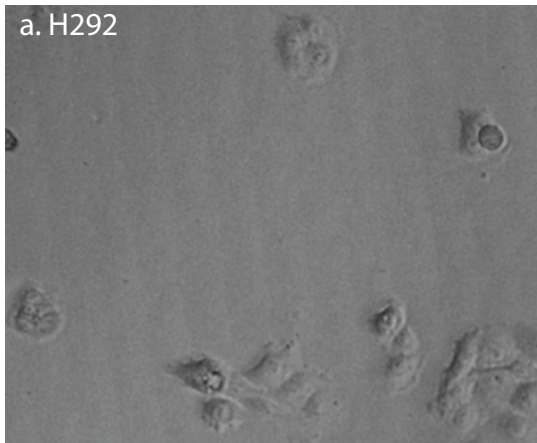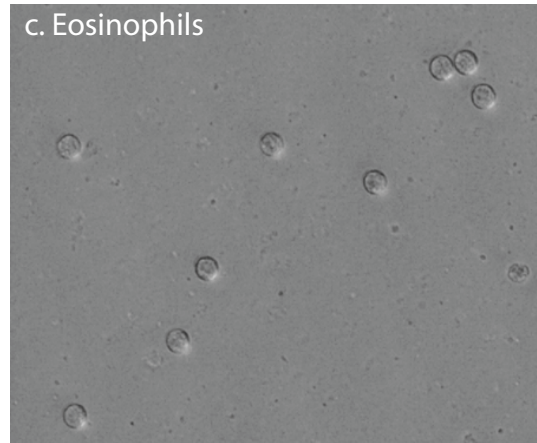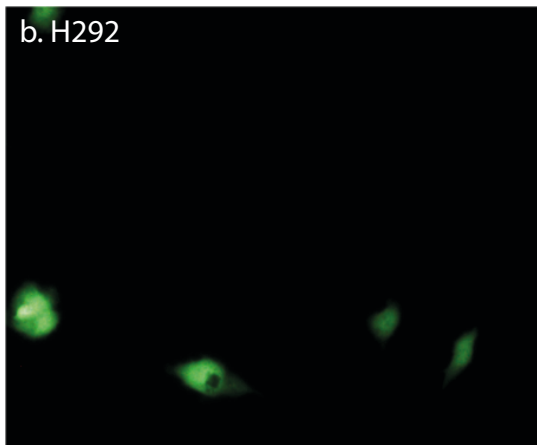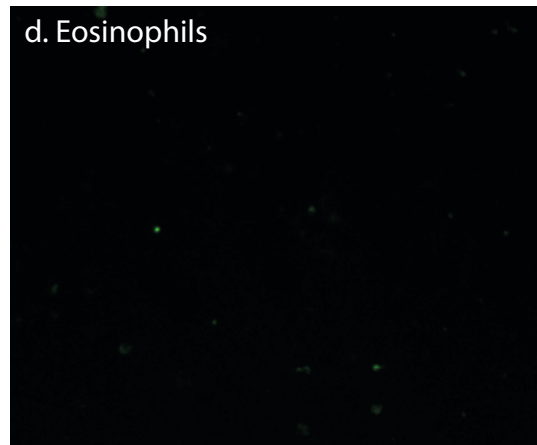

Supplement: ALL-74-1898-s002.pdf [file ALL-74-1898-s002.pdf]

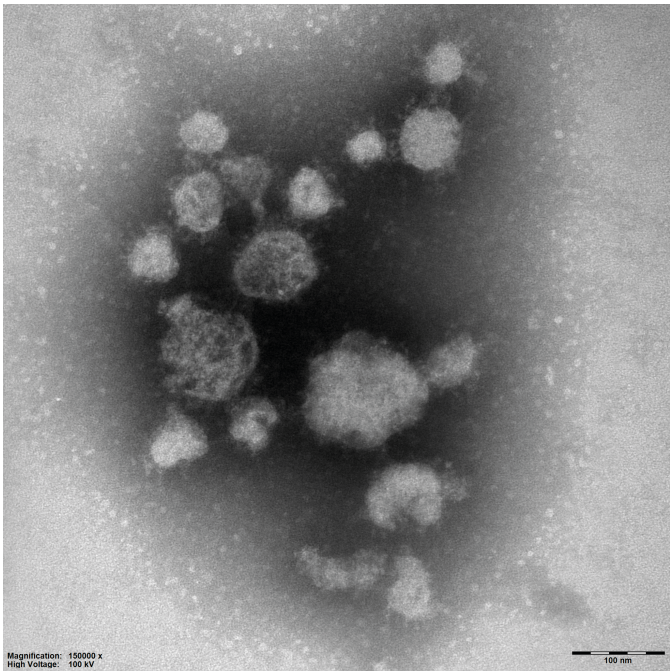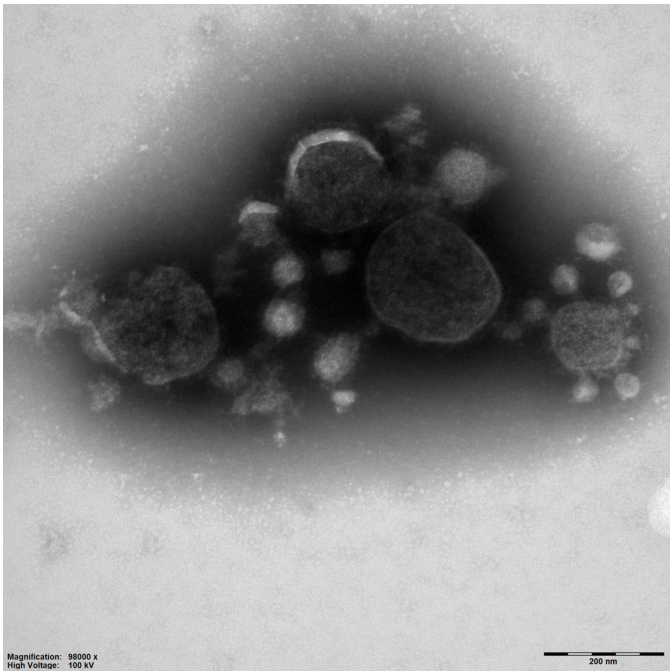

Supplement: ALL-74-1898-s003.pdf [file ALL-74-1898-s003.pdf]

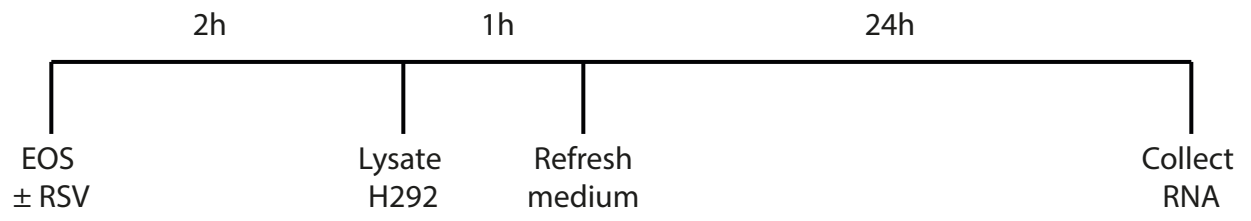

Supplement: ALL-74-1898-s004.pdf [file ALL-74-1898-s004.pdf]

a

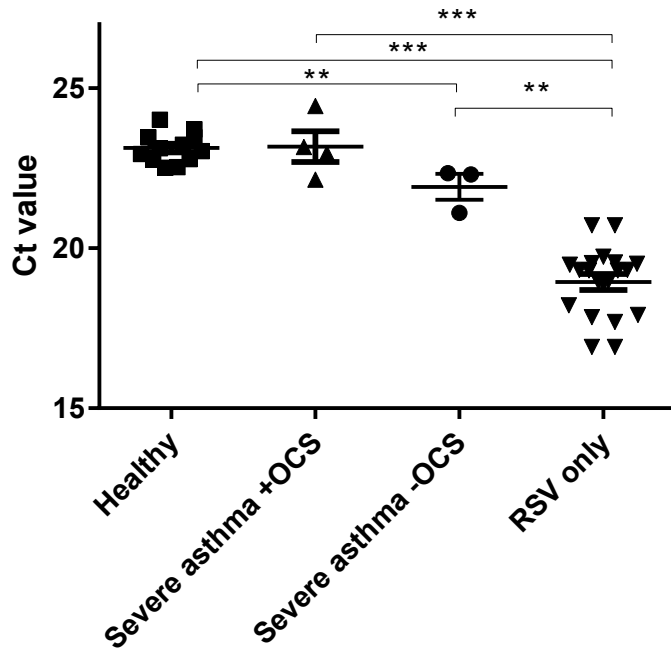

b

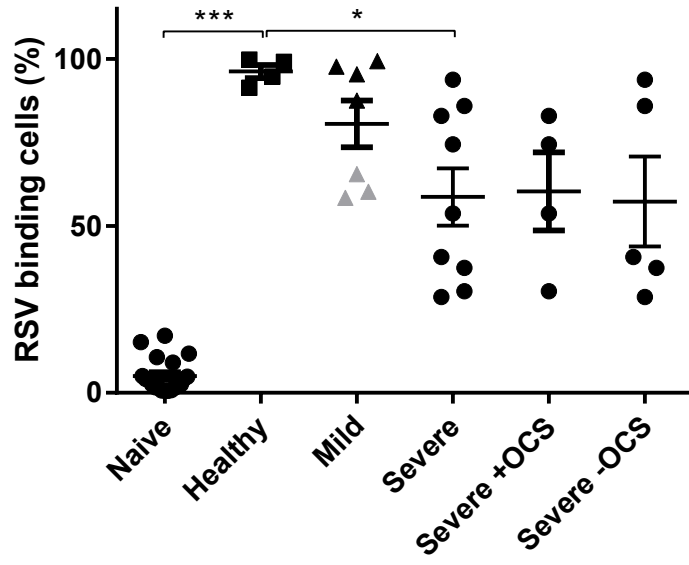

Supplement: ALL-74-1898-s005.pdf [file ALL-74-1898-s005.pdf]
